# Supplementary material
Source: PubMed Central journal article supplement (PMC8508108)
Supplement: jb.00359-21-s0001.pdf [file jb.00359-21-s0001.pdf]

Figure S1. Amino acid sequence alignments of VirB4 (A) and VirD4 (B) from *C. difficile* (Cd, WP\_011861114 for VirB4 and WP\_011861117 for VirD4), *S. suis* (Ss, ABP89935 for VirB4 and ABP89939 for VirD4), and *A. tumefaciens* (At, NSY78098 for VirB4 and WP\_010974920 for VirD4). Walker A and Walker B motif sequences in *A. tumefaciens* are shown in **bold+italics** (panel A, pos. 476-483; panel B, pos. 158-181) and **bold+underlined** (panel A, 679-698; panel B, 428-445) fonts, respectively. Amino acid residues in Walker A and Walker B motifs of VirB4\_CTn4 and VirD4\_CTn4, substituted during the current study, are shown in **bold+curved-underlined** font.

A

```

VirB4_Cd (1) -----MYPDGIKCKVTKRYSKCVMFEDINYQLAQADDKTAIFENV
VirB4_Ss (1) VKKLLKHSMPKPKTSSNKKKQTKTKQKQEI RSTVNTLAYQGLFQNGLMQISPSYFSQTYLLGDVNYQTVGLDDKGAIVEKY
VirB4_At (1) -----MLGASGTTERR-----SGEIIYLPYIHLSDHIVLLELGSIMSIARLLGVALEELTEMRNARCRAF
81 160
VirB4_Cd (41) CDFLNYFDASVSVQLSFINQGTQR---EQAEKATISIPAQEDAFNS-----IRTEYSDDLKNDLSKGNNGLVHKKYIT
VirB4_Ss (81) SDLINSDDQTNFQLIFNQKVNLI---EKFRKSIILYPLQEDGFDA-----YRDELNRMM DANLEAGENNFSAVKELS
VirB4_At (61) NTLRLNADHDVSIYAHIVRHADV PSSAPLHFRSFAASLNEAFQRVLSGQLLRNDHFLTLIVYPQAALGKVKRFRFTKL
161 240
VirB4_Cd (110) FTVEADNKAAAKSRLSRIETDVLNNFKVLGV TARPLSGY-----EHLKVLHG FHPGEFFSFSFDWLTTPSGLTKDFI
VirB4_Ss (150) FGSDDQTPKVAFRSLSQIGEYFKSGFSELDVALGLLGG-----BRVNLADMLRGENHHPFSKDLILSGQTTKHF
VirB4_At (141) SGKRENDLQIRNEDLWHVAVAGSLKAYGLHRLGTR EKQGVLFTEIGEALRLINTGRFTFPVPSVSGSLGASIIYDTRVIC
241 320
VirB4_Cd (184) APSSFHFGEGRYFRGKKIGASFI EILAPELNDRLADILDLE TGVIVNLHRSIQSEAKTKRKRITDLDKMKIEEQ
VirB4_Ss (223) APTYLSFKHKNHIELDDRLLQIVYVRDYGMLGDGFRDLN QSDLEVMISLHAKGSTKSETMTKLRKKILMESQKIGEO
VirB4_At (221) GKRLEIR---TPKDSYVGSIIYSFREYPAKTRPGLNALLSLDFLVLVQSFSFTRPQAHAKISLKSQMLS-S-GD
321 400
VirB4_Cd (264) KKAVRSGYDMDIIPDLATFGSEAKNLLQDQSRNERMFLLTFLVMADTKRKLNDIFAAAGTAQKYNCRITRLDYQQ
VirB4_Ss (303) QKMARTGIYLEKVGHLNENINEAEALLQTTQTGDKLFDTVFLGVLADTEDQKQSLDIKQVAGSNDMLIDNLTymo
VirB4_At (294) KAVTQIGKLSAEADALASNEFVMGSHHLSLC-----VYADDLNSLGDGRGARARTRMADAGAVVVEGIGM
401 480
VirB4_Cd (344) EAGLLSSVPIGENLIP-IQRGLTTSSTAIFIPFIQELFQI GOALYGLNALSNN---MILCDRKQLKNPGLIIGTTPGS
VirB4_Ss (383) EAAFNSSLFPCKNYLEGVSRSLTNSIAVNA PWTVSDIQDKG-GKPYGINQLSSN---IISIDRGKLNTPSGLIIGTSGA
VirB4_At (359) EAAVWSQLPGNFKWRTR-RPGAITSRNFAGFVSENFPEGASGHWGTAIARFRINGGTTPFDYIPHEHDVGMATAIFGPIGR
481 560
VirB4_Cd (420) GKSFAAKREMTNAFLITDD---DIIICDPEAEYFSLVQRLNGQVIRLSPTGRGIDGKQVYNPMDINLNYSEDDNPLAIK
VirB4_Ss (459) GKGMA TKHEIISTKLEADSDTEIIVDPENEYSIIQOAFGGESIDLAPDS-----TFLNVLDSL DEN-MDEDPVKVK
VirB4_At (438) GKTTLMMFVLA MLEQSMVD RAGTVVFFDKVRGGE LLVRATGGTYALRRGI-----PSGLAPLRGLEN T-----AAS
561 640
VirB4_Cd (497) SDFILSLCELVI GGGEGLPVDKTVIDRAVRNVYRPF LADEDPKAKMPILGLYDELLRQPEPEAARIAAALELYVSGSLN
VirB4_Ss (532) SEFLLSWIGKLLDRK--MDGREKSLIDRVRTLYHFDT-----PSLVEWVFLVAQQPEAKDLALDMELYVSGSLD
VirB4_At (505) HDFLREWIVALIESDG-RGGSPEENRRLVRGIRHQLSFD E---QMSIAGLRFLHGAEGAARLQRWCRGHALGWA
641 720
VirB4_Cd (577) VFNHRTNVELNNRLVCFDIKQLGKQLKGLMLIVQDQ TWNRVINRAEKKSTRYVMEDEFHLLLEQTAAYSVEIWKRRFR
VirB4_Ss (603) IFSHRTNIKTDSHFIIYNNVKLGLDELKQIALMVI FDIWNRVVKNQKLGKKTWYFDQMQLLLKYASDFFKILWSRVR
VirB4_At (581) FDGEVDEVKLLPSITGFDMLHLLYEVEVCPAAA LLHRIGANID---GHLFVSCDEFRAYLLNPKFSAVVVDKFLLTVR
721 800
VirB4_Cd (657) KNGGIPTAITQNVKDLLASREVENIFENSDFVLM LNQAQGRITIIAKQLNISPOQMKYVHTHEAG---EGLIFYGNVILP
VirB4_Ss (683) KYGAIPTGITQNVETLLLDANGRRITANSEFMILLKQAKSDREELVHMLGLSKELEKYLVNPEKG---AGLIKAGSTVVP
VirB4_At (658) KNNGLLILATQCPHEHLESPLGASLVAOCMTKIFYPSP TDRSAYIDGLKCEKEEFQALREDMTVGSRKFLIKRESGSI
801 852
VirB4_Cd (734) FVDFFPKDELYRVMITKPEVSSL-----
VirB4_Ss (760) FKNKTPQHTKLEDMSTDPKMR-----
VirB4_At (738) CEFDRDMREYVAVLSGRANTVRFARLRQAEGNSSGWLSEFMARHHEAD

```

B

```

VirD4_Cd (1) ---MPELKKLILLNAPYLLFVYLFDKVQAVRLSPGADLSGKVLSLADGHSAAAFANPLP---SFFPADLLIIGIVGAVLIR
VirD4_Ss (1) ----MYSRRFAFVFGLLGLAFGYFCHRLITLYDSLTNAPPMEFFAYLLGEGLNQVFNPLWLFATQKSLLAFILGLVLTMT
VirD4_At (1) MNSSITTPQRLAVSIVCSLAAGFCAASLYTFRHGFNGEAMMTFSVFAFWETPLMGMHATPWFYCGLAIVVSTSIIVLL
81 160
VirD4_Cd (76) LMVYIKGKNACKYRKGI EYGSARWGNAE DIKPYTDFVQNNVLLTQTERITMNSRPKQTRVARNK--NLLVIGGSGSGKX
VirD4_Ss (77) LVYLVSTGQKVYREGE EYGSAREGTSKSKRNFYKPNPFNDTILARDVRLTLEK-KKPLFDRNK--NLLVIGGSGGAGKT
VirD4_At (81) SQLTIS-----FRNHEHGHARWAGFGEMR-HAGYLQRYNRKIPPIFGTTCGPRWFVGYLTNGEQPHSLVVAPTRAGK
161 240
VirD4_Cd (154) RFFVKPNLMQMHSSYVVTDPKGTLVCEGKLLQRGGYRIVKLVNTLN-FKKSMRYNPFAYIRSE--KDILKLVNTLIANTK
VirD4_Ss (154) FRFVKPNLIQNCNINIVDPKDHLEAKTGKLFLENGYQVKVLDLVN-MTNSDGFNPFVRYVETE--NDLNRLMTVYFNNTK
VirD4_At (154) VGVVITPLLTFKGSVIALDVKGELEFELTSARKAGGDAVFKFSPIDPERRTHCYNPFVLDI AALPPERQFTETRRILANLI
241 320
VirD4_Cd (231) GDGEKAGEDFWVKSERLIFYCALIGYIWEAFA-----EEEK-----N---FTTLEMINASEAREDDPEFQSPVLDLMPER
VirD4_Ss (231) GSGSRS-DPFWDEASMTLVRAIASVIVDFYNPPGSSKQEQEARRKRGRYPAFSEIGKLIKLSKGDNDQKSVLELVFEDY
VirD4_At (234) TAKGKGAEGFIDGARDLFAVAGILTCIERGTF-----TIGAVYDLFAQPG-E-----KYKLFAN
321 400
VirD4_Cd (297) LEEKDPEHFAVROYKFKLLSAGKTRSSIIISCGAR-LAPFDIKELFDLMDTDEMELDTIGDRKTA LFVITSDTDDTFNFV
VirD4_Ss (310) AKKYGHENFTMRNWADFQNYKDKTILDSVIAVTTAK-FALFNIQSVIDLTRDRTMDLKTWTGQKTMMVYLIPDNDTFRFL
VirD4_At (286) LAEESRNKEAQRIFDNMAGNDTKILTSYTVLGDGGLNLWADPLVKAATSRSDFSYDTRKRTCVYLCVSPNDLEVVAP
401 480
VirD4_Cd (376) VSILYTLQFNLLCDKADDEYGGRLPVHVRCLLDEFANIGQIPKFEKLIATIRSRREISASII LQSQSOLKAIYKDN--ADT
VirD4_Ss (389) SALFSTVFSITLROADVDFKQQLPHVRSYLDDEFANVGEIPDFAEQSTVRSRNSLSPILQNLAQQLGKYKEKAWKT
VirD4_At (366) LMRLLFQVVVSILOGLSPGKDERH--EVLFLDEFKHLGKLEAIEITAITITAGYKGRFPIIQSLSALTGIYDDAG-KQN
481 560
VirD4_Cd (454) IVGNCDTTLFLGGKIKTTLKETSEILGKETIDSFNTSENREGREVSHGLNYQKLGKQLMTEDEIAVMDGGKCILQLRQVRF
VirD4_Ss (469) ILGNCDSELLVGNDETEFKFMSGLLKGQITIDVRSSTRSFGQTGSSTSSHQKIARDLMTADEVMNMRDECLVRIAGVPV
VirD4_At (443) FLSNTGVQVFMATADETPTVYSKALGDYIFKARSTSYSQRMFDHNICISDQGAFLRPEQVRLIDDNNEIVLILGHPP
561 640
VirD4_Cd (534) FFSKDYDITKHPNYKYLSDYDKNFTFMEKHLRRRFA LVKPEVFDYVEISSEDLQEDTTHE-----
VirD4_Ss (549) FRTKKYFPLKHNKWLAD---KETDERWVHYHINPLTAFEEVDSLGHKTRDLSTETTTH-----
VirD4_At (523) LKLRVRYYSRMLRRLFECQIGALPEPASLMLSEGVHRRGQDLSQAAVTEAQLGDIISIPNNMEAATPQNSEMDDEQ
641 706
VirD4_Cd (596) -----
VirD4_Ss (606) -----
VirD4_At (603) DSLPTGIDVPQGLIESDEVKEDAGGVVDPFVSAEMAPAMIAQQQLLEQI IALQQRYPASSHSVK

```

Figure S2. Grouping of VirB4- and VirD4-like proteins within T4SS of Gram-positive and Gram-negative microorganisms. The dendrogram was created using AlignX module of Vector NTI ver.11 (Thermo Scientific). Species names, NCBI database protein tags and relatedness scores (in brackets) are shown.

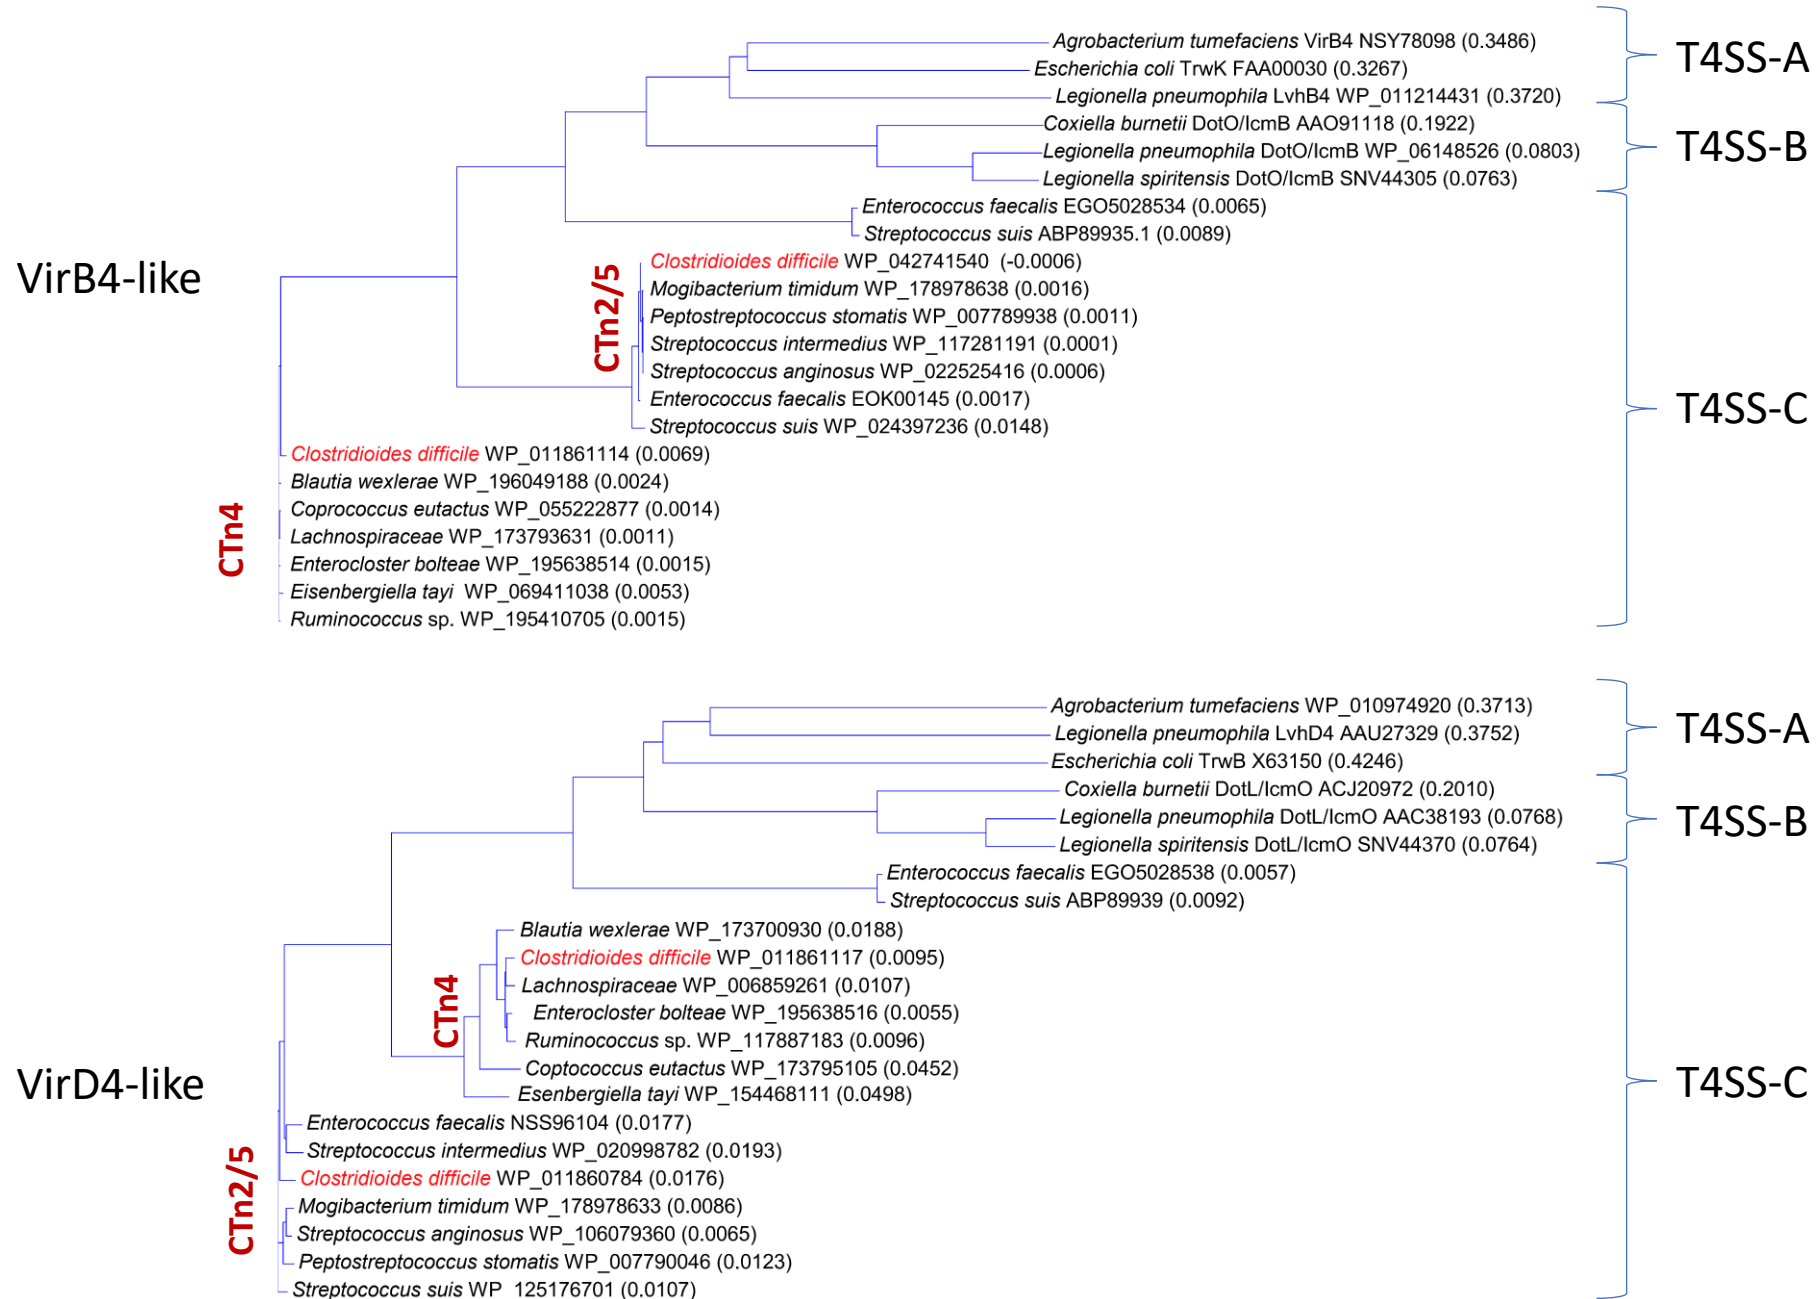

Figure S3. SDS-PAGE analysis of VirD4 and VirB4 of *C. difficile*. A. Full size VirD4\_CTn4 (D4) and VirB4\_CTn4 (B4) were purified from water soluble cytosolic (Cyt) and 6M urea-soluble membrane (Mem) fractions of *E. coli* extracts as 6His-tagged proteins. Expected positions of target proteins are shown by asterisks on the right. A gel with silver stain is shown. B. NH<sub>2</sub>-terminally truncated delVirB4\_CTn4 (B4) and delVirD4\_CTn4 (D4) were purified as cytosolic MBP-tagged proteins (10 µg each), isolated from Lysogeny broth (LB) or Terrific broth (TB) liquid cultures. A gel with Coomassie stain is shown. M, molecular mass markers in kilodaltons (kD) are shown on the left.

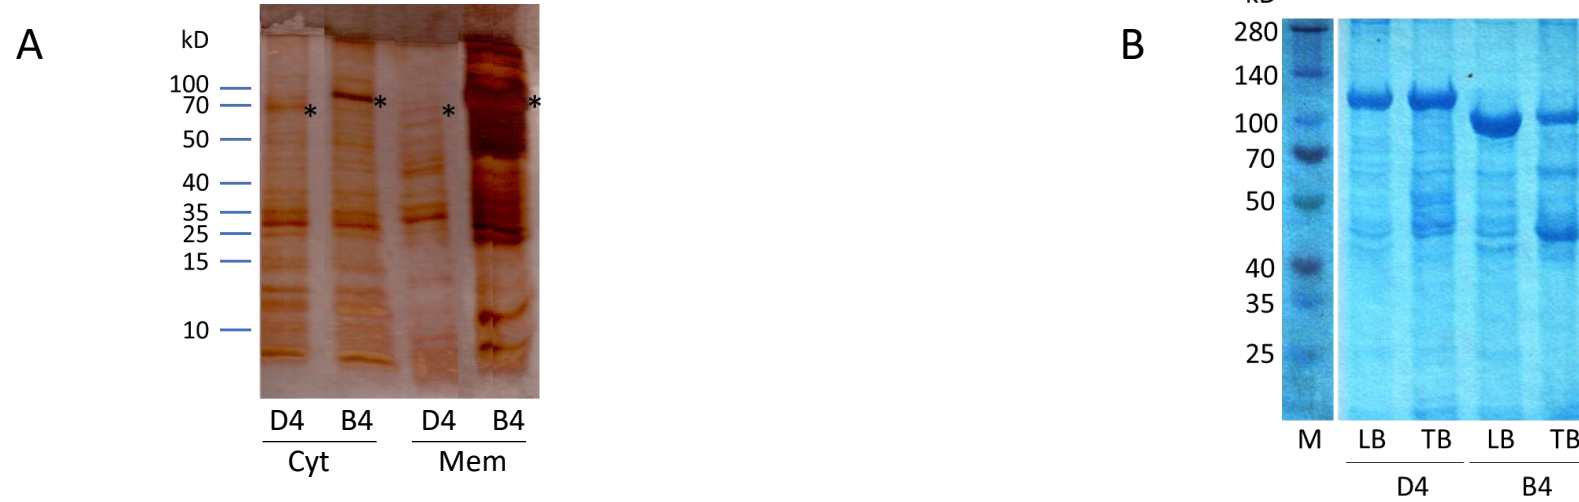

Figure S4. Analysis of full size VirB4\_CTn4 and VirD4\_CTn4 produced in *B. megaterium* as 6His-tagged proteins. A. The purified protein (B4, 10  $\mu$ g) was run on 10% polyacrylamide gel and stained with PageBlue. M, molecular mass markers in kilodaltons (kD) are shown on the left. B. ATPase activity of VirB4 variants was estimated with malachite green assay as described in Materials and Methods. MBP and MBP-tagged delVirB4\_CTn4 were used as negative and positive controls, respectively. C. Western blot analysis of crude full size VirD4\_CTn4 (D4, 72 kD) and VirB4\_CTn4 (B4, 90 kD) proteins in water-soluble cytosolic (Cyt) and 6M Urea-soluble membrane (Mem) fractions of *B. megaterium* extracts. Purified VirB4\_CTn4 on the right lane (B4, as shown on panel A) served as a positive control. Reaction of the blotting membrane with Ponceau S stain and anti-HisTag reagent is shown on the left and right respectively. Expected positions of target proteins are shown by asterisks on the right. Size of molecular mass markers is shown in the middle in kilodaltons (kD).

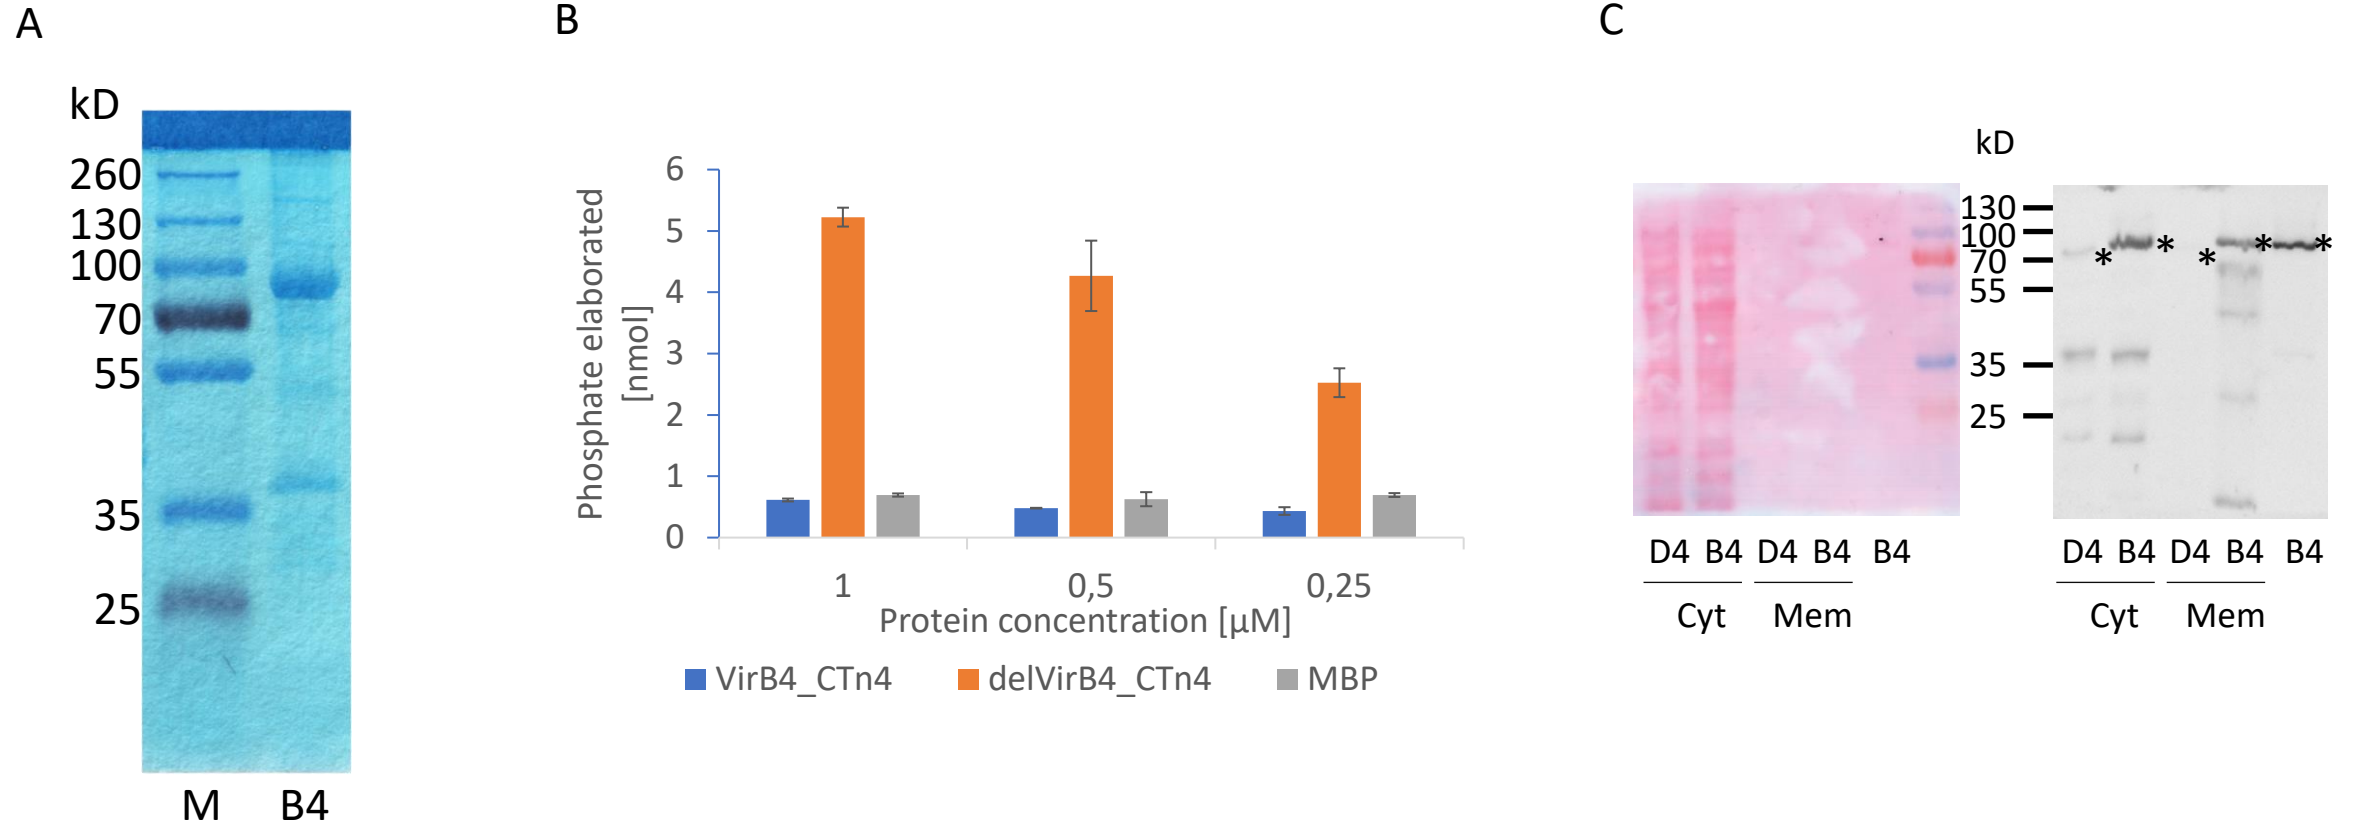

Figure S5. Influence of protein concentrations (A) and temperature of incubation (B) on ATPase activity of delVirD4\_CTn4 (D4) and delVirB4\_CTn4 (B4) as estimated by Enliten assay.

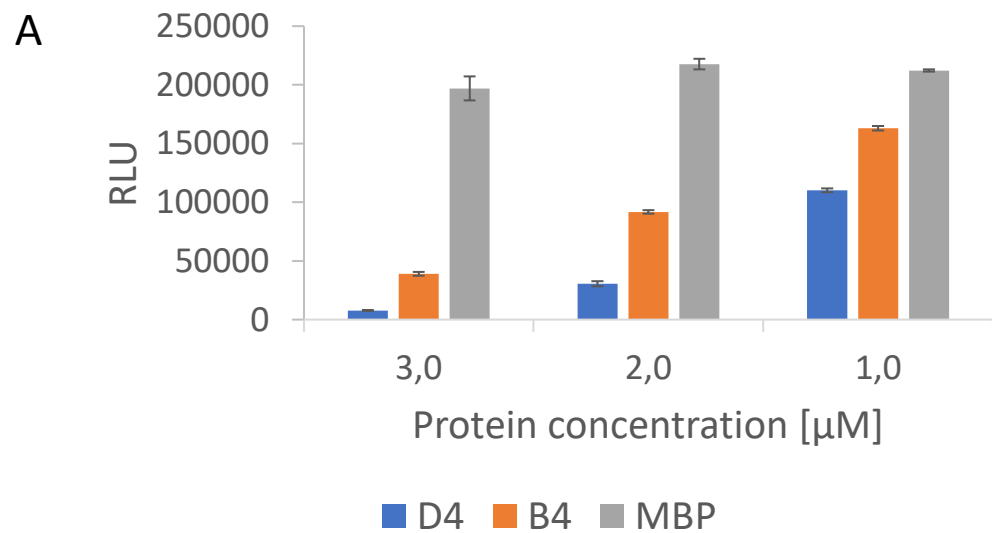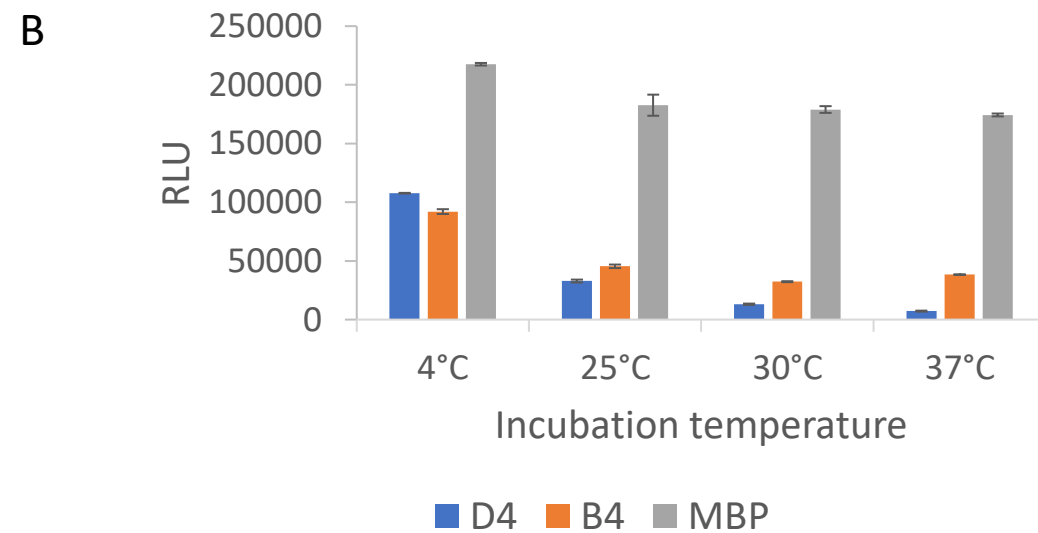

Figure S6. Oligomer stability of the wild type and site-mutated delVirB4/D4\_CTn4 variants. Purified by MBP-tag chromatography delVirB4\_CTn4 (Panel A) and delVirD4\_CTn4 (Panel B) variants were subjected by Superdex200 chromatography in 20mM Tris-HCl, pH=7,4 plus 75 mM KCl.

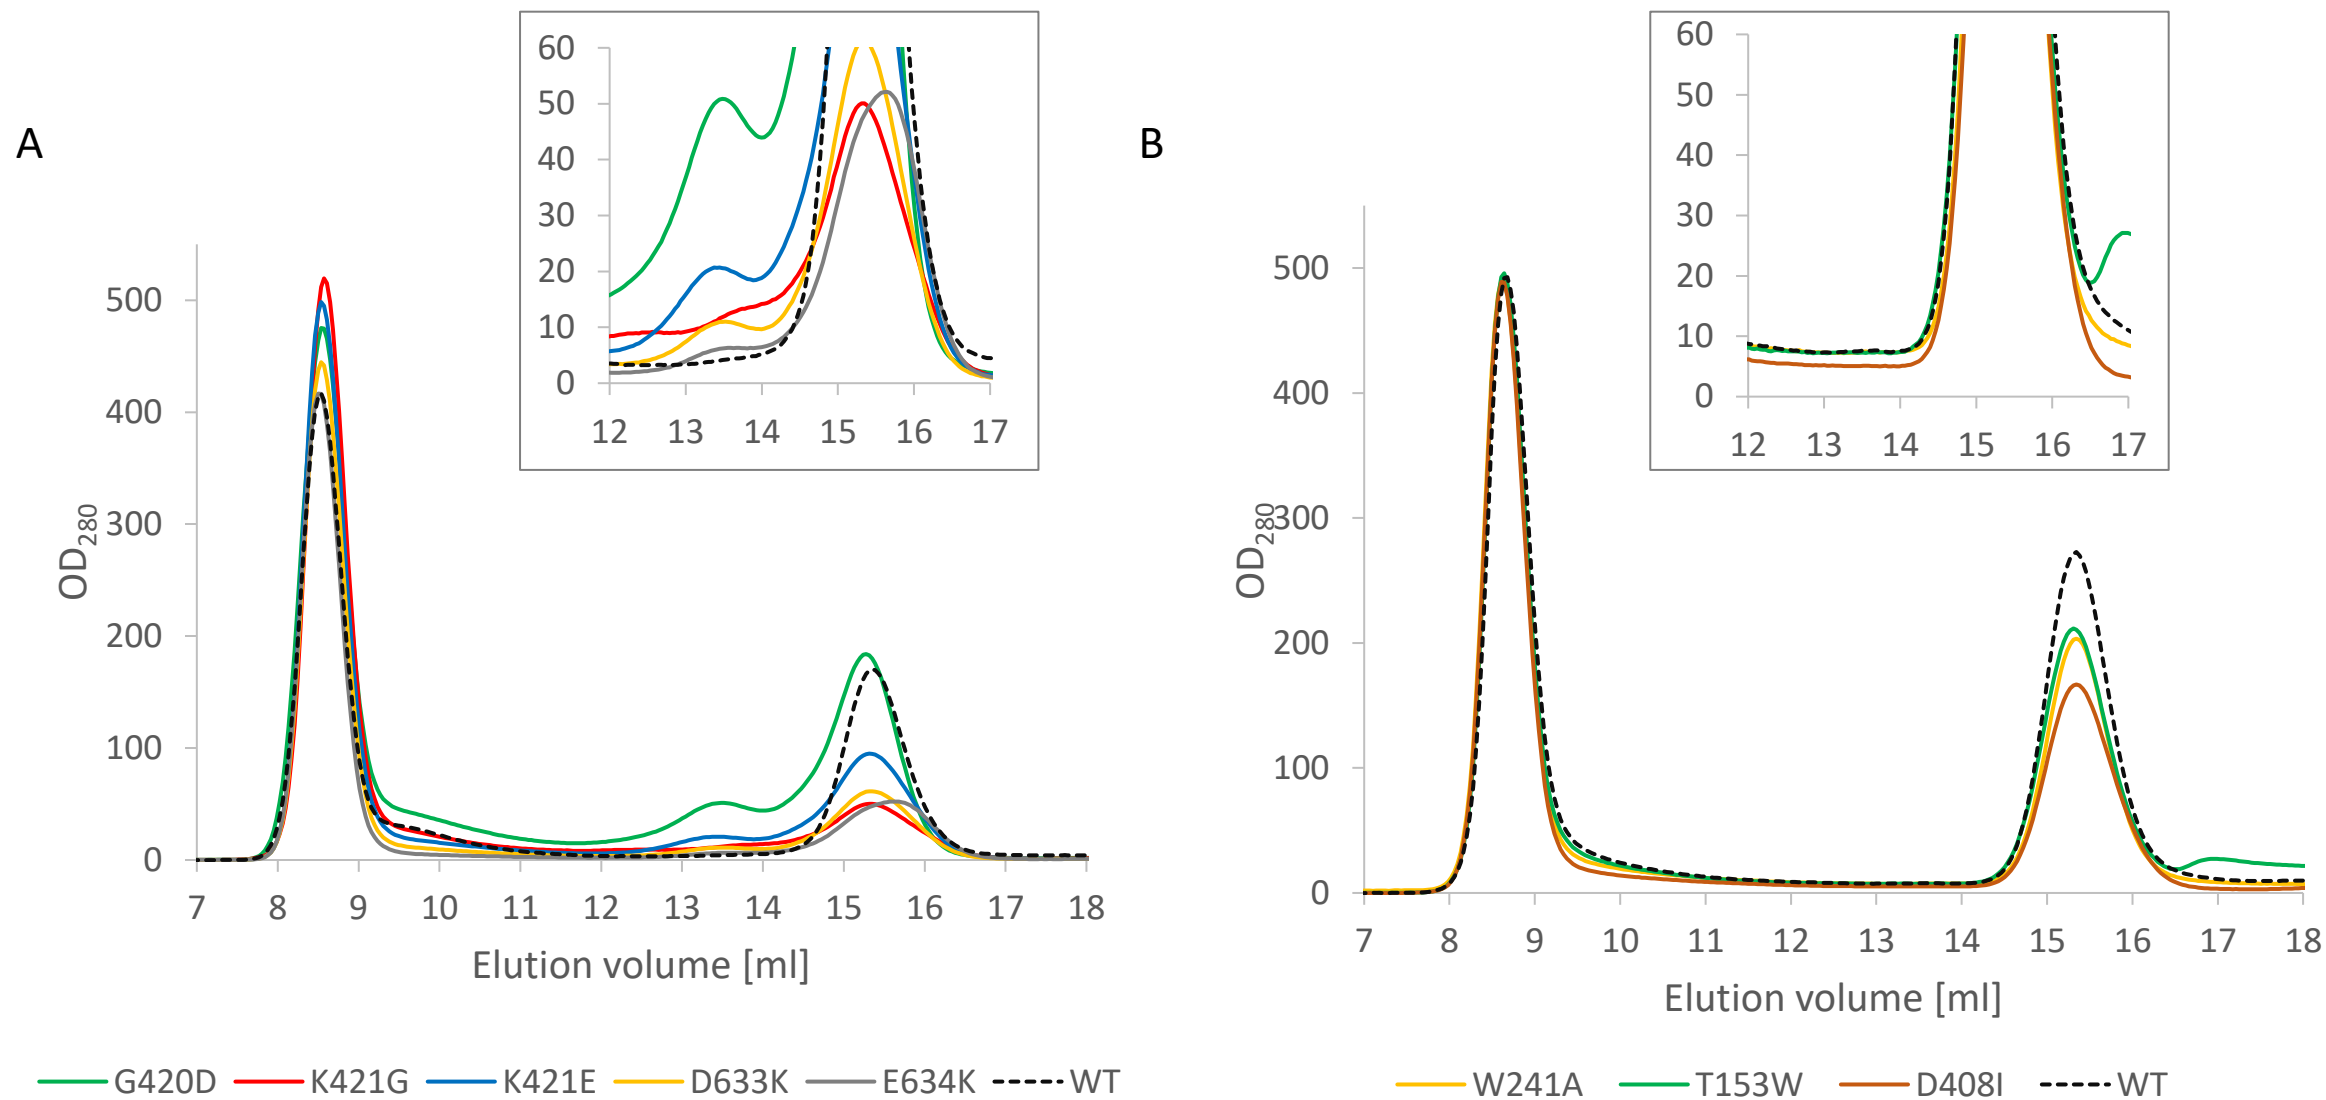

Figure S7. Influence of EDTA and salts of divalent metals on plasmid dsDNA migration in agarose gel electrophoresis. Plasmid dsDNA pRS313 (3,3 nM) was mixed with EDTA or divalent cations (2 mM each) with or without delVirB4\_CTn4 or delVirD4\_CTn4 *C. difficile* proteins (3  $\mu$ M), incubated for 30 min on ice and analyzed by 0,5% agarose gel electrophoresis. M, nucleic acid marker, size of major fragments is shown on the left.

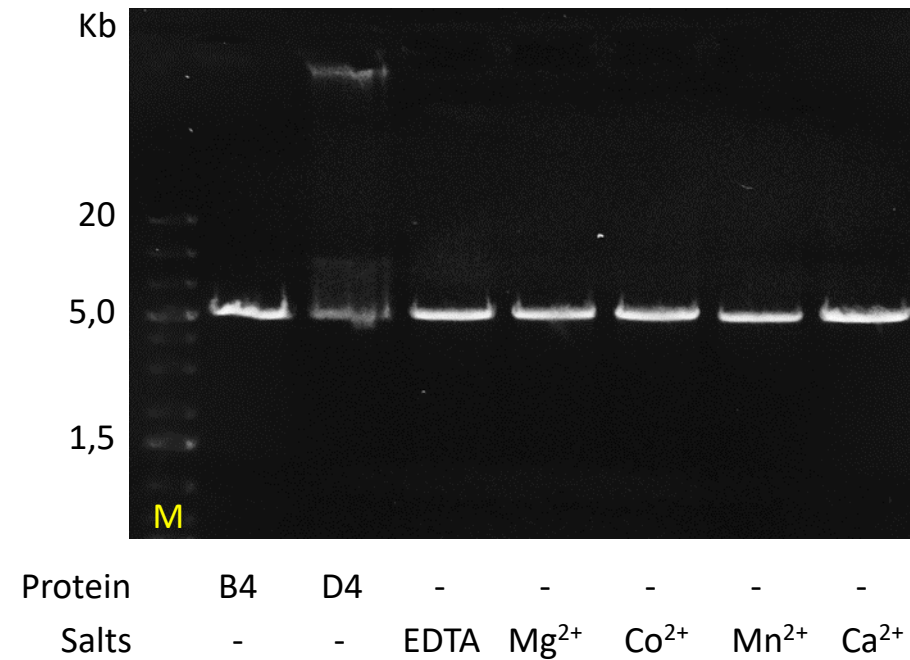

Figure S8. ATPase activity of the delVirD4\_CTn4 wild type and W241A variants. The enzymatic activity was studied by malachite green ATPase assay with 100  $\mu\text{M}$  ATP for 1h at 35°C.

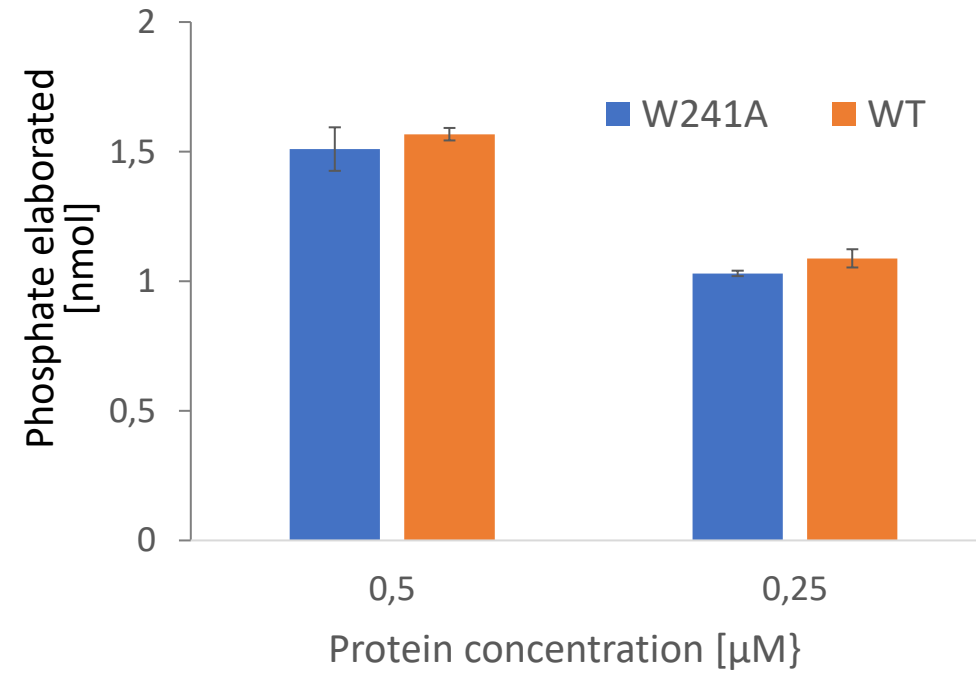



Figure S9. Influence of dsDNA (pRS313, 5 $\mu$ g/ml) on ATPase activities of delVirB4\_CTn4 (1  $\mu$ M) and delVirD4\_CTn4 (0,5  $\mu$ M) was studied by malachite green ATPase assay with 100  $\mu$ M ATP for 1h at 35°C.

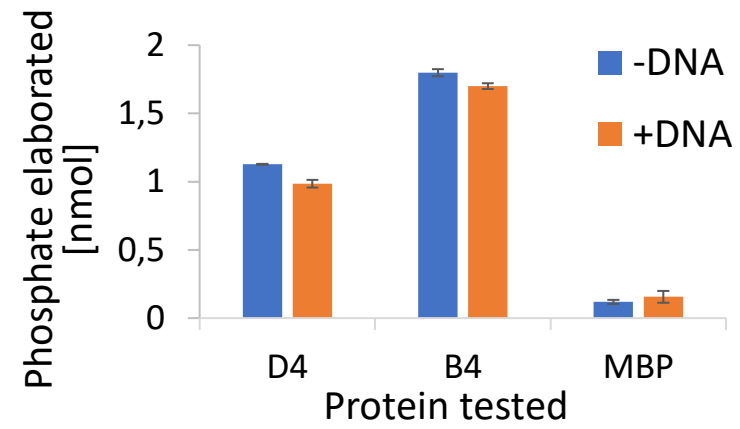

Table S1. Components of T4SS coded by *C. difficile* 630 chromosome.

| Protein<br>Transposon | VirB4                  | VirB6                | DNA-mt                | CHAP                  | VirD4                 |
|-----------------------|------------------------|----------------------|-----------------------|-----------------------|-----------------------|
| CTn2                  | Orf12,<br>CD630-04180  | Orf9,<br>CD630_04150 | –                     | Orf13,<br>CD630_04190 | ORF5,<br>CD630-04120  |
| CTn4                  | ORF9,<br>CD630-11100   | Orf7,<br>CD630_11120 | Orf10,<br>CD630_11090 | Orf11,<br>CD630_11080 | ORF4,<br>CD630-11150  |
| CTn5                  | Orf12,<br>CD630-018560 | Orf9,<br>CD630_18530 | –                     | Orf13,<br>CD630_18570 | ORF5,<br>CD630-018490 |

Table S2. Oligonucleotide primers (f-forward, r-reverse) used for PCR amplification. Engineered *restriction endonuclease sites* (if any) are shown in **bold**.

| Primer ID | Nucleotide sequence, 5'-3' direction                                                      | Description             |
|-----------|-------------------------------------------------------------------------------------------|-------------------------|
| # 16f     | TAATACGACTCACTATAGG                                                                       | pET28, universal        |
| # 17r     | GCTAGTTATTGCTCAGCGG                                                                       | pET28, universal        |
| # 474f    | <b>GCAGAGCT</b> CATCATCATCATCACAG, <i>SacI</i>                                            | pET28, universal        |
| #475r     | <b>CTCAGGTACCTTT</b> CGGGCTTTGTTAG, <i>KpnI</i>                                           | pET28, universal        |
| # 808f    | <b>GAGGTATCCATATGAAGCC</b> GGAAC, <i>NdeI</i>                                             | full size VirD4_CTn4    |
| # 809r    | <b>GCGTGAATTCTCTCTTTCTTTTCG</b> , <i>EcoRI</i>                                            | full size VirD4_CTn4    |
| # 812f    | <b>CTACCTTCATATGTACCC</b> GGACG, <i>NdeI</i>                                              | full size VirB4_CTn4    |
| # 813r    | <b>GCCAGGGAATTCCG</b> ATTAAGTCC, <i>EcoRI</i>                                             | full size VirB4_CTn4    |
| # 1014f   | <b>CCCTACACGGATCC</b> GGTATTTTC, <i>BamHI</i>                                             | truncated<br>VirD4_CTn4 |
| # 1038f   | <b>AGACGGGGGGATCC</b> CTTTACTAT, <i>BamHI</i>                                             | truncated<br>VirB4_CTn4 |
| # 1613r   | CGGGAAGCGGAGAATCCTTTGCGGC                                                                 | VirB4 K421E             |
| # 1614f   | GCCGCAAAGGATTCTCCGCTTCCCG                                                                 | VirB4 K421E             |
| # 1615r   | CGGGAAGCGGAGGTTCTTTGCGGC                                                                  | VirB4 K421G             |
| # 1616f   | GCCGCAAAGGAACCTCCGCTTCCCG                                                                 | VirB4 K421G             |
| # 1617r   | CGGGAAGCGATAAATCCTTTGCGG                                                                  | VirB4 G420D             |
| # 1618f   | CCGCAAAGGATTTATCGCTTCCCG                                                                  | VirB4 G420D             |
| # 1619r   | GCTACTATATGCGCGAGTTTCACTTGC                                                               | VirB4 D633K             |
| # 1620f   | GCAAGTGAAACTCGCGCATATAGTAGC                                                               | VirB4 D633K             |
| # 1621r   | CGCTACTATATGGACAAGTTTCACTTGCTC                                                            | VirB4 E634K             |
| # 1622f   | GAGCAAGTGAAACTTGTCCATATAGTAGCG                                                            | VirB4 E634K             |
| # 1639r   | AAGCGGCAGCGGCGACACAAGATTT                                                                 | VirD4 K152D             |
| # 1640f   | AAATCTTGTGTCGCCGCTGCCGCTT                                                                 | VirD4 K152D             |
| # 1641r   | AAGCGGCAGCGGCAAGAAGAGATTT                                                                 | VirD4 T153K             |
| # 1642f   | AAATCTCTTCTTGCCGCTGCCGCTT                                                                 | VirD4 T153K             |
| # 1643r   | AAGCGGCAGCGGCAAGTGGAGATTT                                                                 | VirD4 T153W             |
| # 1644f   | AAATCTCCACTTGCCGCTGCCGCTT                                                                 | VirD4 T153W             |
| # 1645r   | GCTGTCTGTAAAGGAGTTTGCGAAT                                                                 | VirD4 D408K             |
| # 1646f   | ATTCGCAAACCTCCTTTAACAGACAGC                                                               | VirD4 D408K             |
| # 1647r   | GCTGTCTGTAAATCGAGTTTGCGAATA                                                               | VirD4 D408I             |
| # 1648f   | TATTCGCAAACCTCGATTAACAGACAGC                                                              | VirD4 D408I             |
| # 1649r   | GCTGTCTGTAGACAAGTTTGCGAATAT                                                               | VirD4 E409K             |
| # 1650f   | ATATTCGCAAACCTTGTCTAACAGACAGC                                                             | VirD4 E409K             |
| # 1651r   | TTTGCGGTAAAATCGGAACGGCTCT                                                                 | VirD4 W241A             |
| # 1652f   | AGAGCCGTTCCGATTTTACCGCAA                                                                  | VirD4 W241A             |
| # 1502    | CAAATCACCATTGAACCTGGTGTGGA<br>TGTCGAAGTTGTTGTTGCTTCCAACAG<br>CAGCGGTCACCATCACCATCACCATTAG | ssDNA                   |
